# Supplementary figures and images for: Understanding creep suppression mechanisms in polymer nanocomposites through machine learning
Source: Royal Society of Chemistry journal article supplement (doi:10.1039/d3sm00898c), 2023-01-01

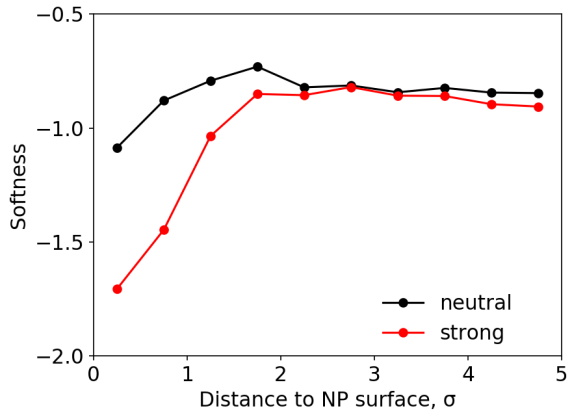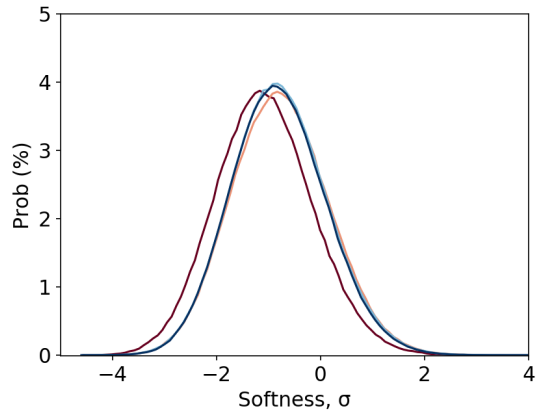

Supplement: d3sm00898c12.pdf [file d3sm00898c12.pdf]

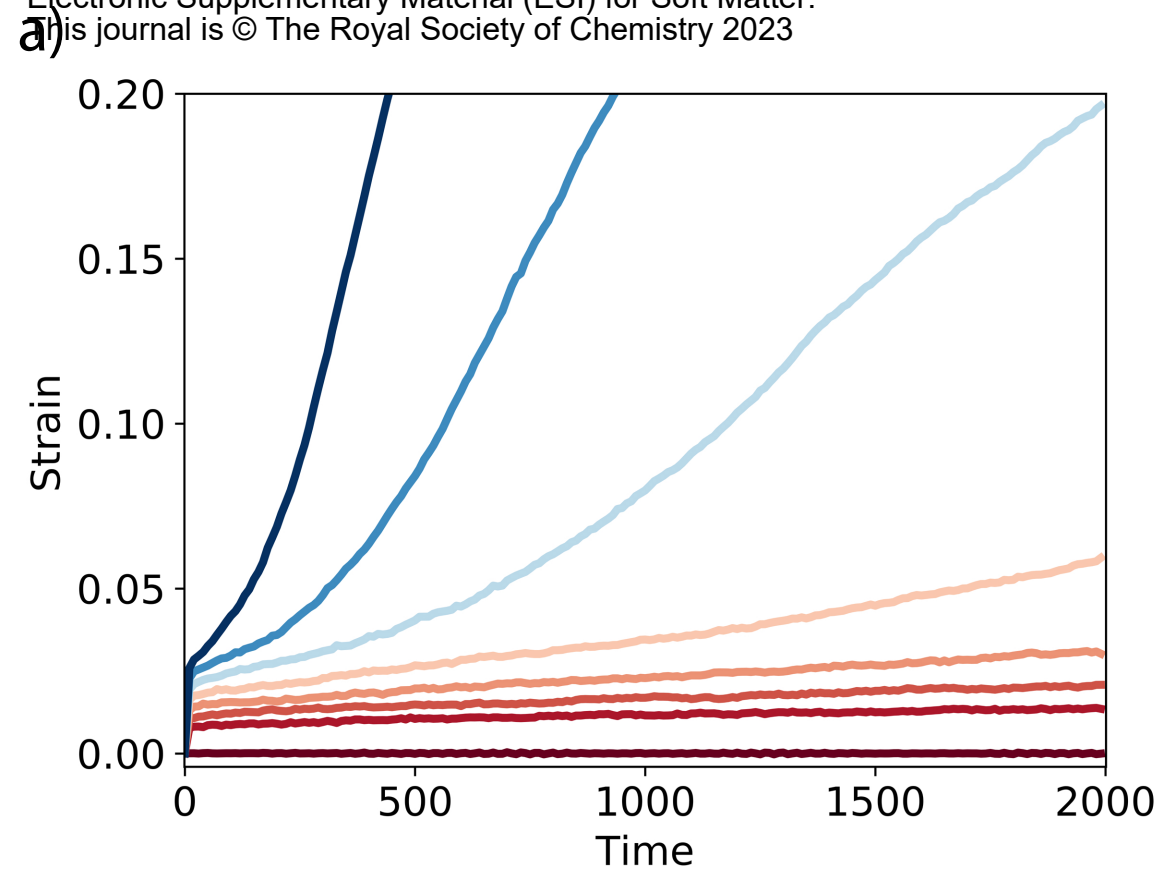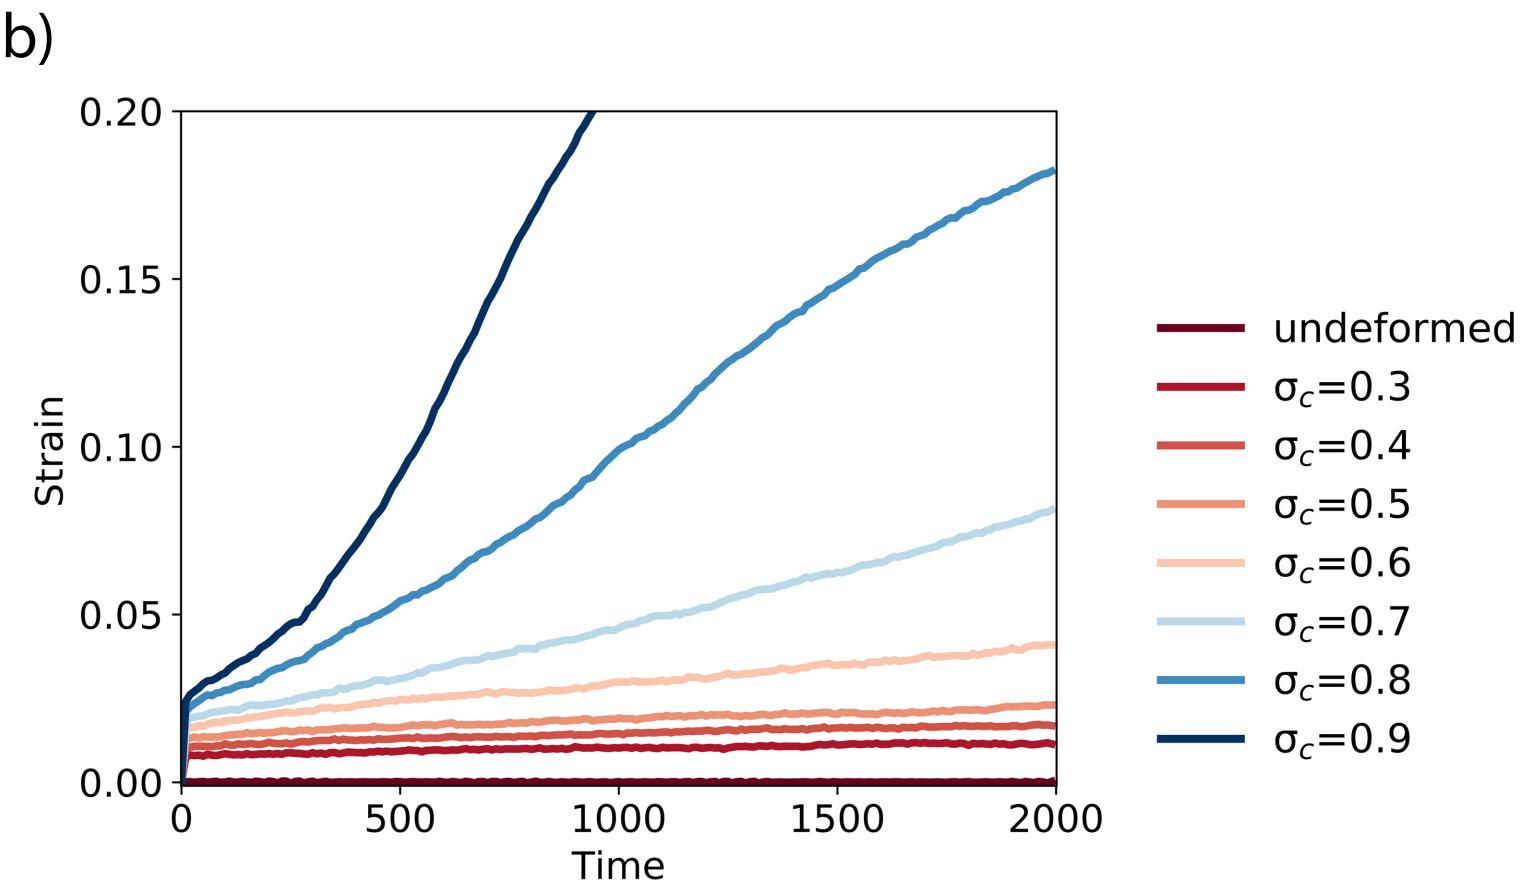

Supplement: d3sm00898c13.pdf [file d3sm00898c13.pdf]

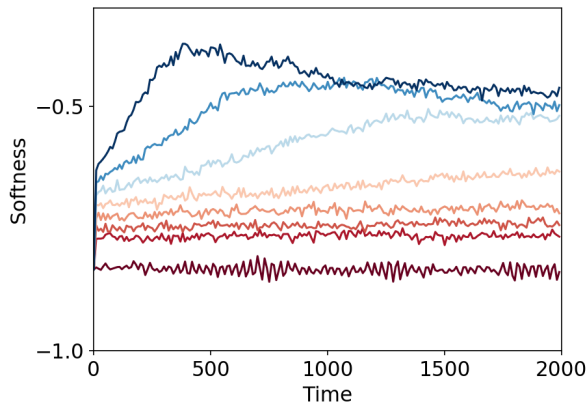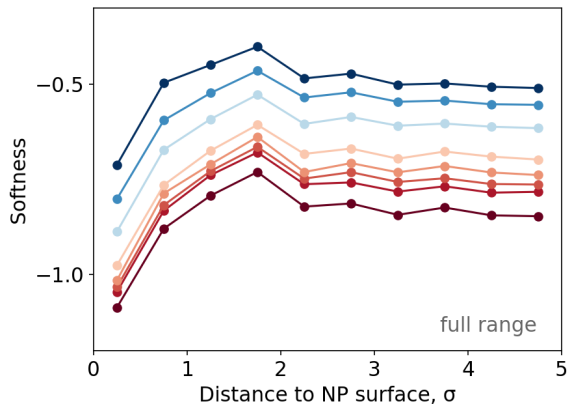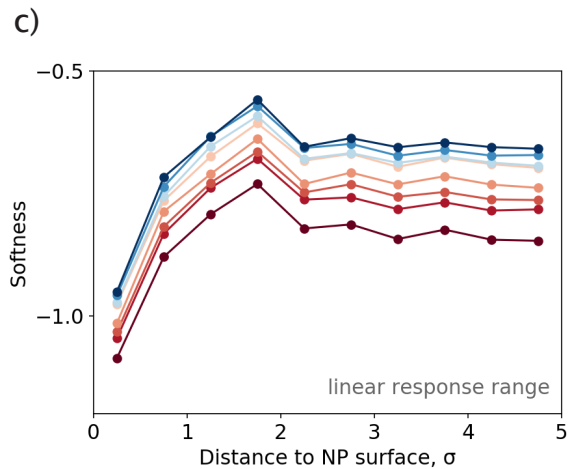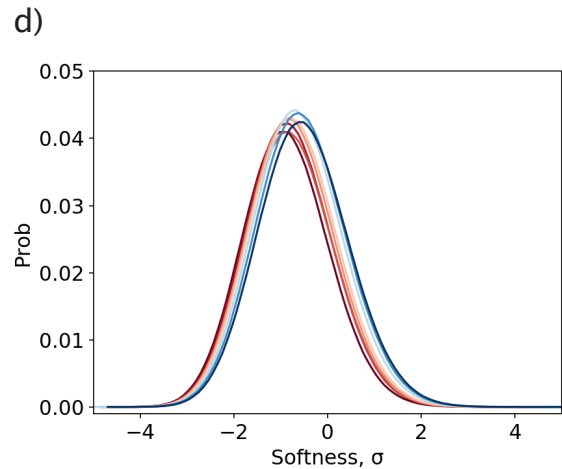

Supplement: d3sm00898c14.pdf [file d3sm00898c14.pdf]

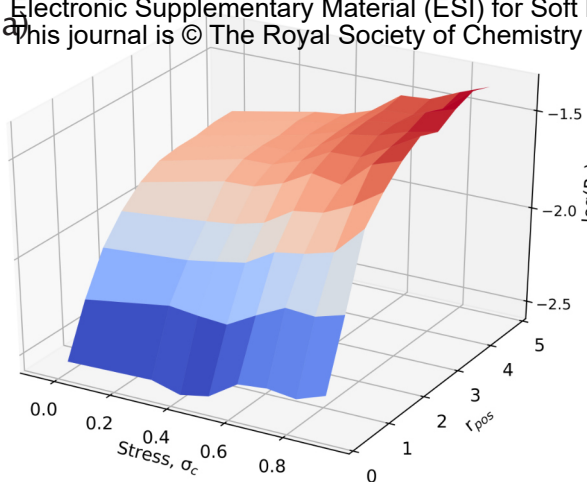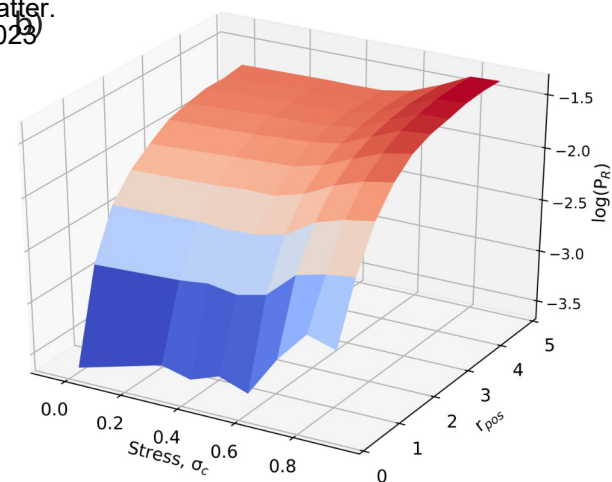

Supplement: d3sm00898c15.pdf [file d3sm00898c15.pdf]

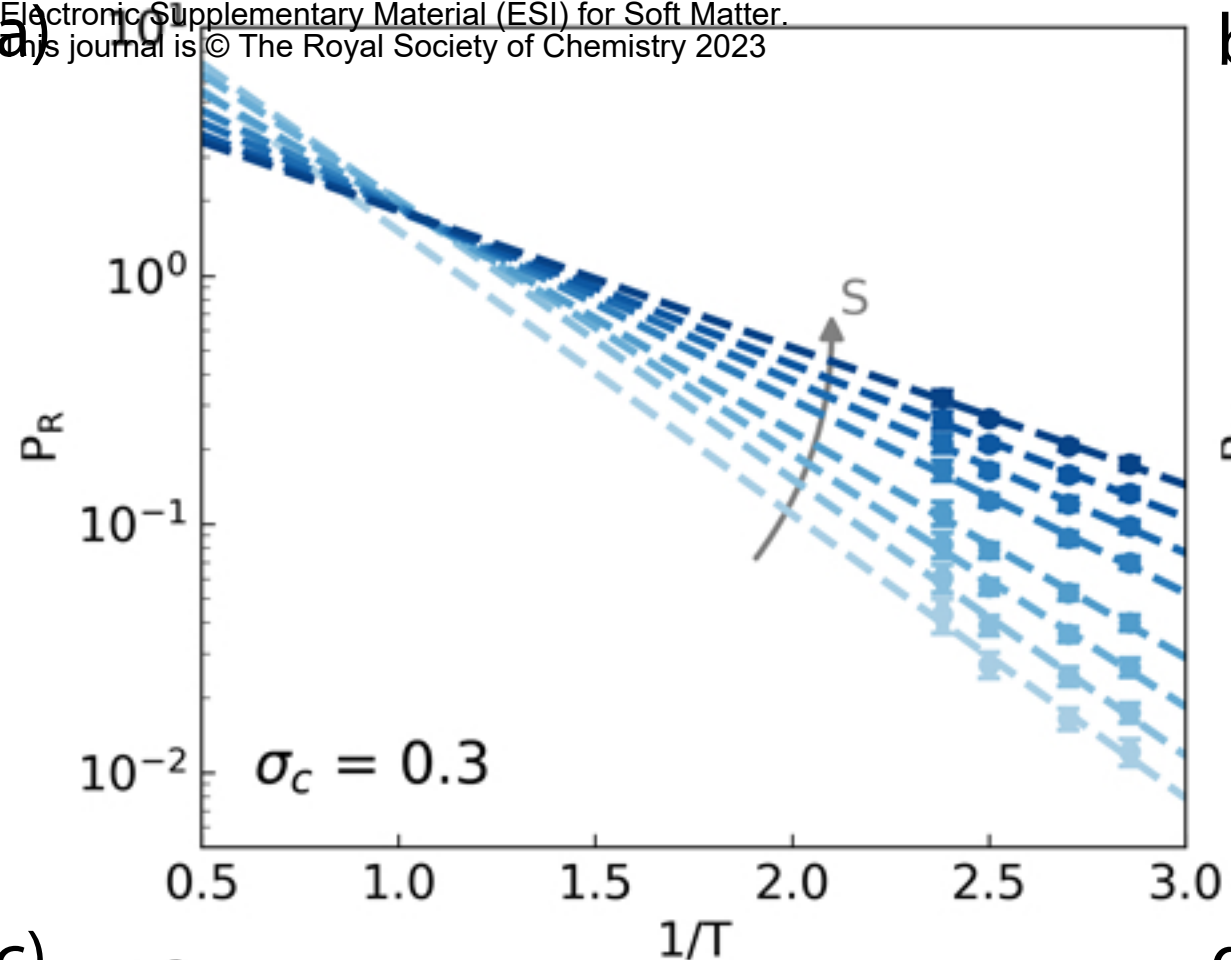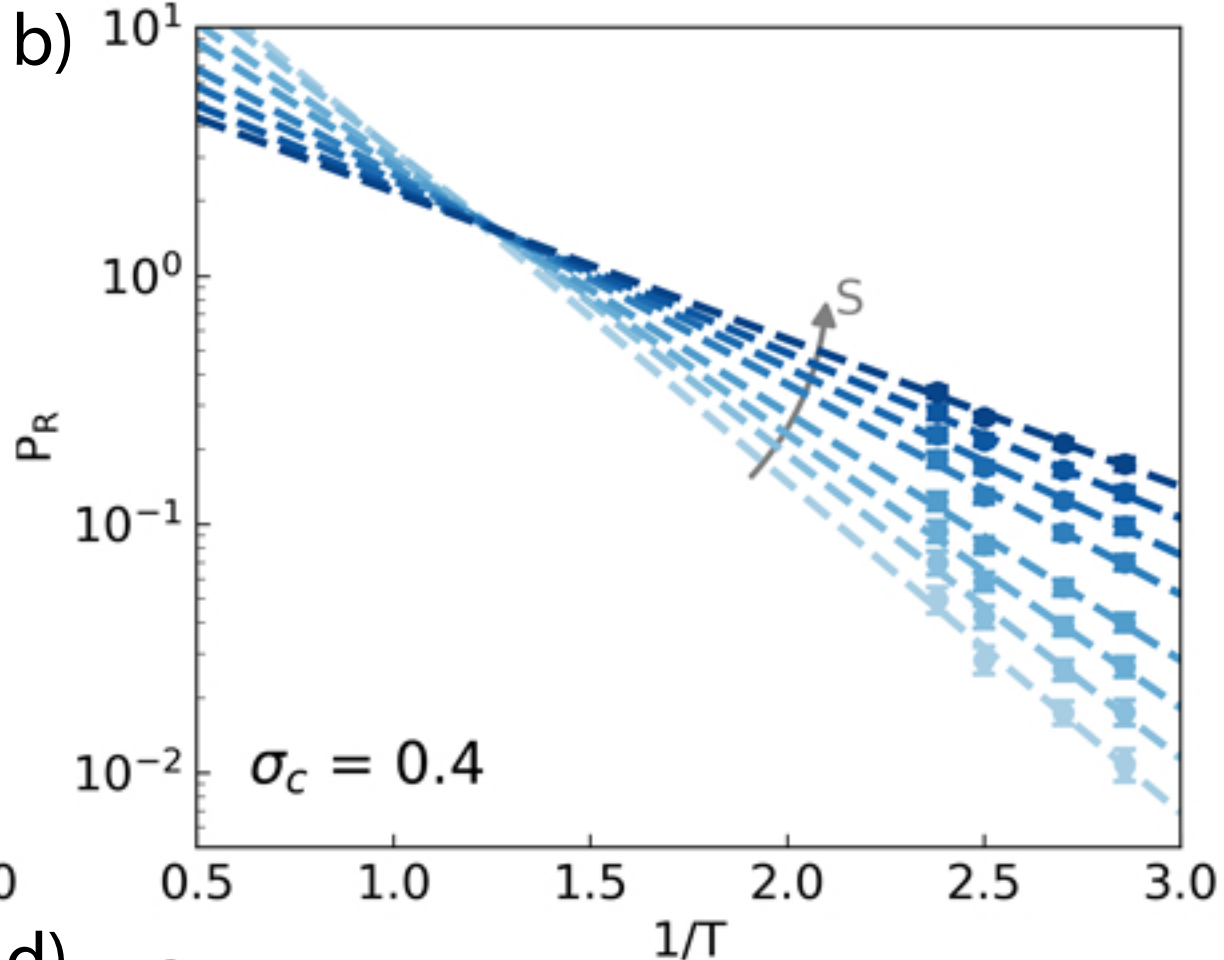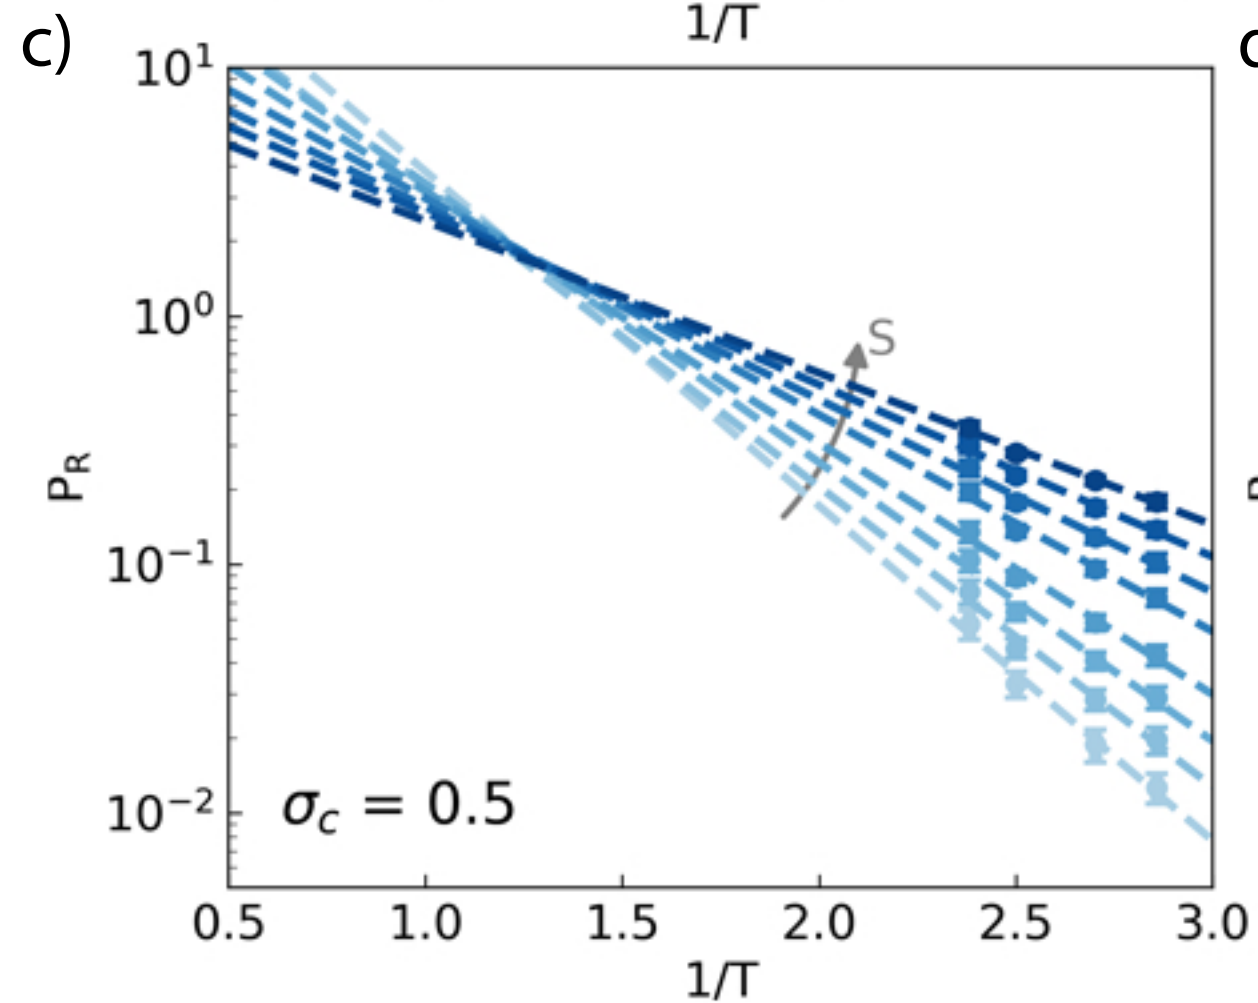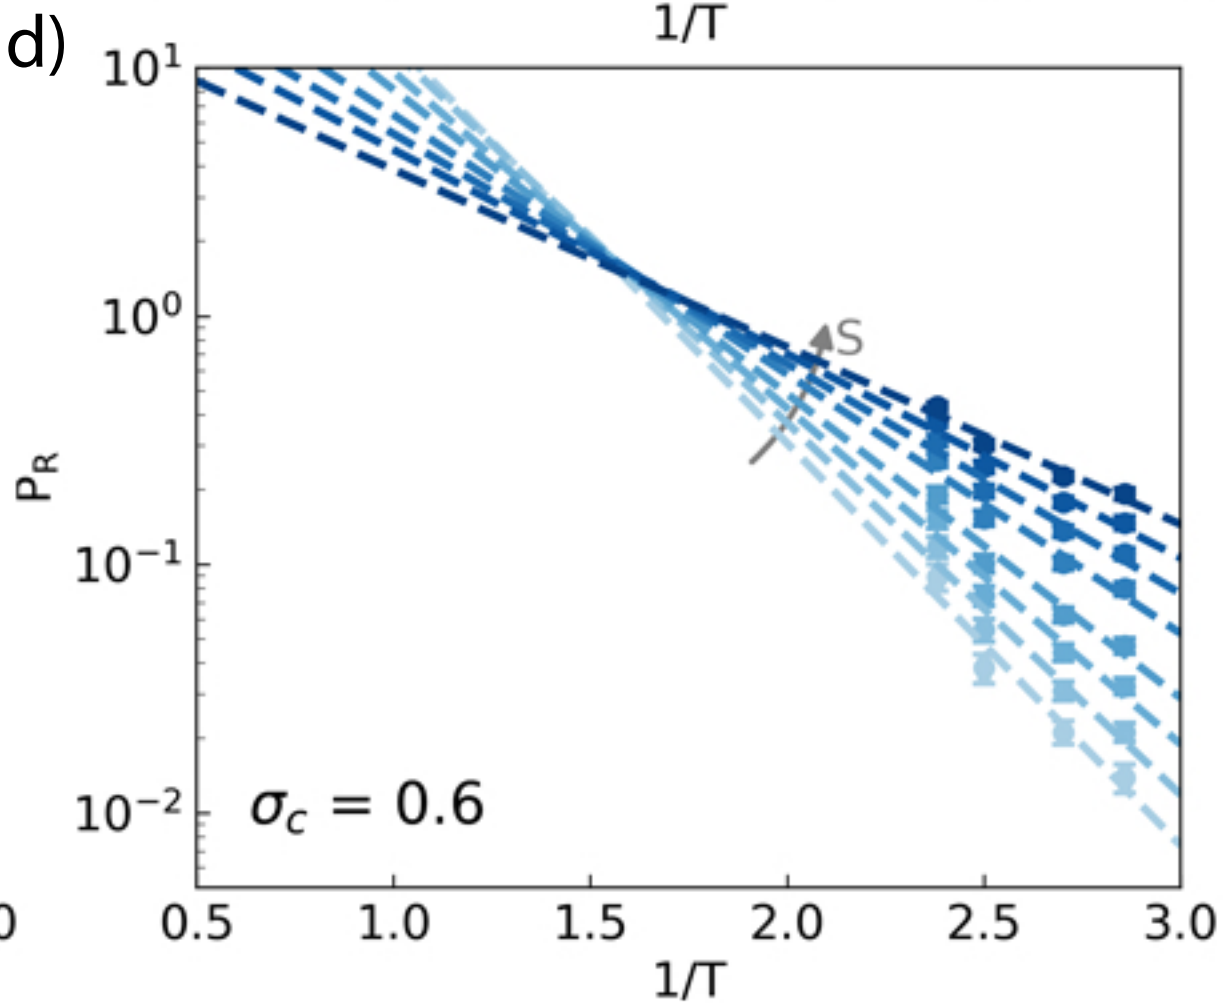

Supplement: d3sm00898c16.pdf [file d3sm00898c16.pdf]

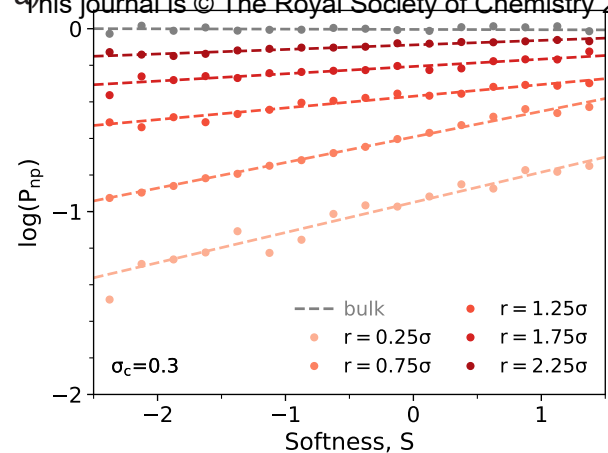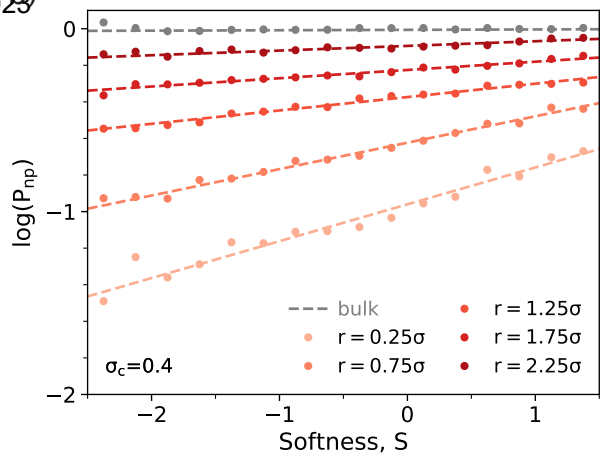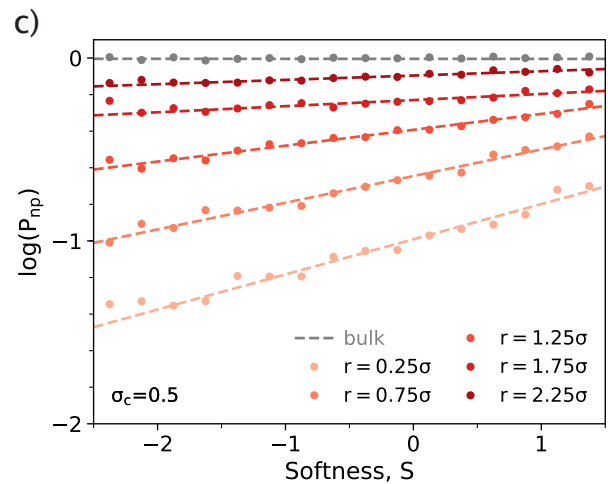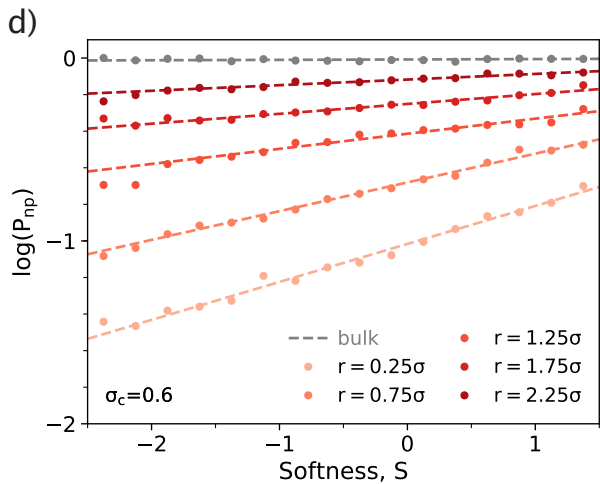

Supplement: d3sm00898c17.pdf [file d3sm00898c17.pdf]

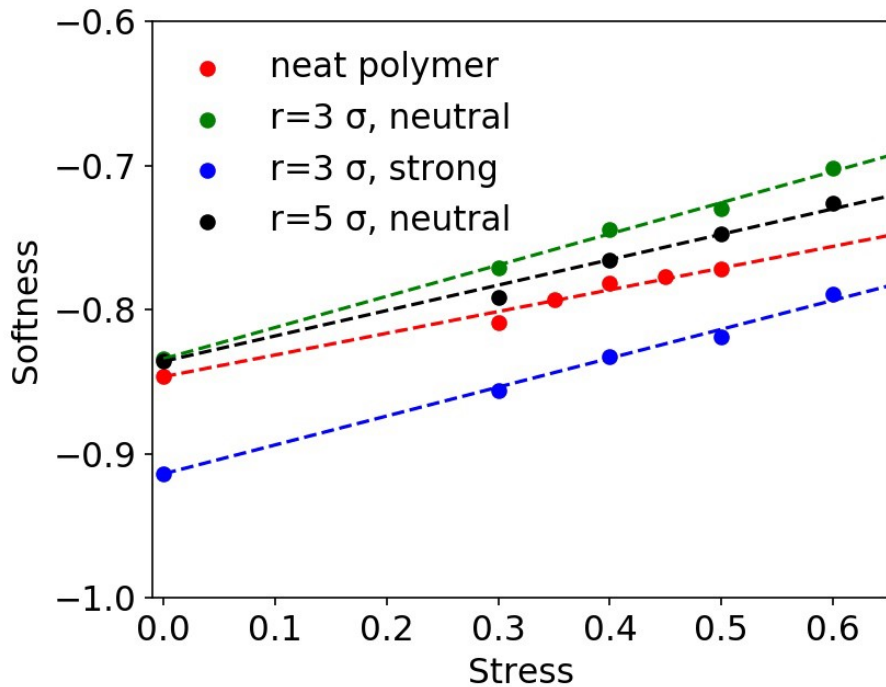

Supplement: d3sm00898c5.pdf [file d3sm00898c5.pdf]

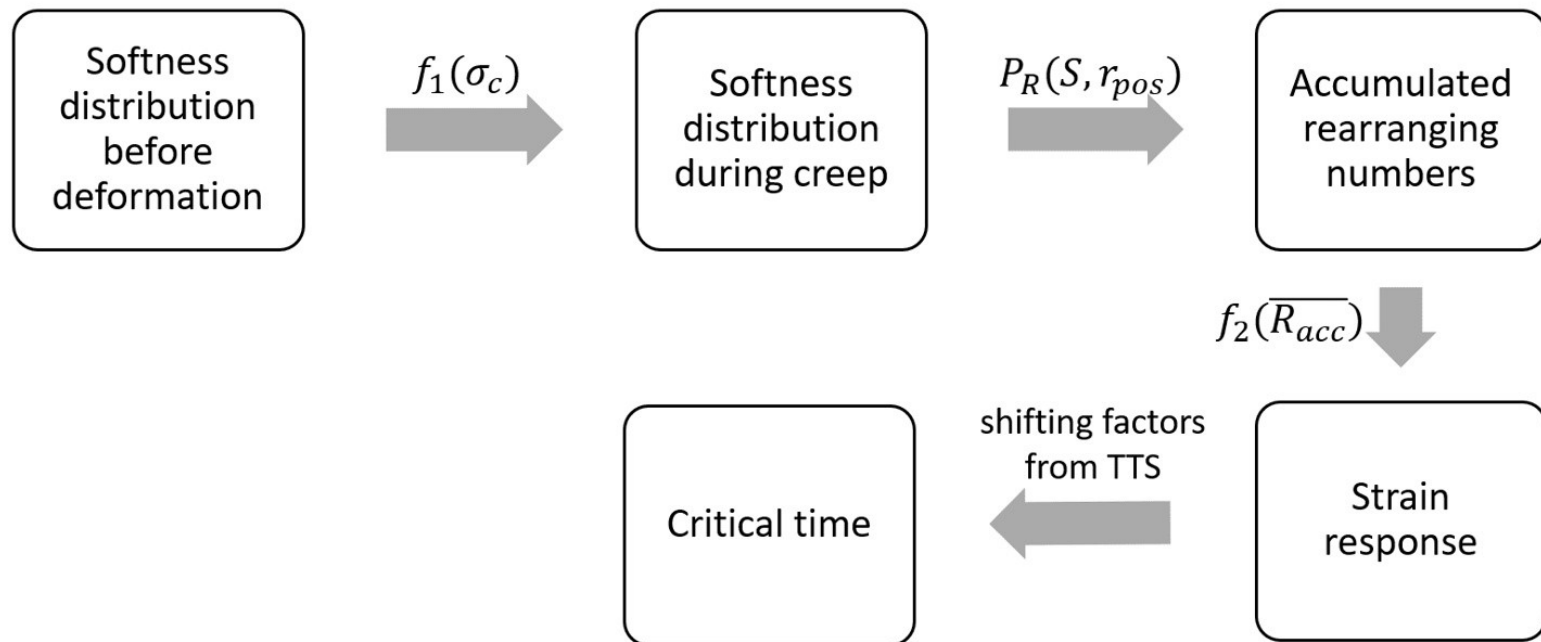

Supplement: d3sm00898c6.pdf [file d3sm00898c6.pdf]
